# Supplementary material for: Vancomycin Pharmacokinetics Throughout Life: Results from a Pooled Population Analysis and Evaluation of Current Dosing Recommendations
Source: Springer Nature journal article supplement (doi:10.1007/s40262-018-0727-5), 2019-01-17
Supplement: MOESM3 [file 16403084]

## Supplemental Table S1

Posology from the summary of product characteristics for “Vancomycin 500 mg Powder for Solution for Infusion” available from [www.medicines.org.uk](http://www.medicines.org.uk) (consulted on May 23rd 2018).

| Patient subgroups according to SmPC | Renal function adjustments                      | Dose (mg kg <sup>-1</sup> ) | Dosing interval (h) |
|-------------------------------------|-------------------------------------------------|-----------------------------|---------------------|
| Neonates < 29 wks PMA               | -                                               | 15                          | 24                  |
| Neonates < 35 wks PMA               | -                                               | 15                          | 12                  |
| Neonates < 1 month PNA              | -                                               | 15                          | 8                   |
| 1 month PNA > children > 12 yr      | eGFR <sub>peds</sub> ≤ 29 mL min <sup>-1</sup>  | 15                          | 24                  |
|                                     | eGFR <sub>peds</sub> ≤ 50 mL min <sup>-1</sup>  | 15                          | 12                  |
|                                     | eGFR <sub>peds</sub> > 50 mL min <sup>-1</sup>  | 10                          | 6                   |
| Adults                              | eGFR <sub>adult</sub> < 50 mL min <sup>-1</sup> | 15                          | 24                  |
|                                     | eGFR <sub>adult</sub> ≥ 50 mL min <sup>-1</sup> | 10                          | 6                   |

eGFR<sub>peds</sub>: estimated glomerular filtration rate in pediatric patients according to equations 1 and 2,  
eGFR<sub>adults</sub>: estimated glomerular filtration rate in adults according to equation 3

$$eGFR_{peds} (mL \min^{-1} 1.73m^{-2}) = \frac{Height (cm) \cdot 0.413}{serum \ creatinine (mg \ dL^{-1})} \quad \text{Equation 1}$$

$$eGFR_{peds} (mL \min^{-1} 1.73m^{-2}) = \frac{Height (cm) \cdot 36.2}{serum \ creatinine (\mu mol \ L^{-1})} \quad \text{Equation 2}$$

$$eGFR_{adult} (mL \ min^{-1}) = \frac{Weight (kg) \cdot (140 - age (yr))}{72 \cdot serum \ creatinine (mg \ dL^{-1})} \cdot 0.85 (if \ female) \quad \text{Equation 3}$$

## Supplemental Table S2

Posology from the label for “Vancomycin Hydrochloride for Injection USP” from the FDA website (www.fda.gov; consulted on May 23rd 2018).

| Patient subgroups according to label | Renal function adjustments      | Dose                   | Dosing interval (h) |
|--------------------------------------|---------------------------------|------------------------|---------------------|
| Neonates < 1 week PNA                | -                               | 10 mg kg <sup>-1</sup> | 12                  |
| Neonates < 1 month PNA               | -                               | 10 mg kg <sup>-1</sup> | 8                   |
| 1 month PNA > children > 18 yr       | -                               | 10 mg kg <sup>-1</sup> | 6                   |
| Adults                               | -                               | 500 mg                 | 6                   |
| Adults with impaired renal function  | eGFR < 100 ml min <sup>-1</sup> | 1,545 mg               | 24                  |
|                                      | eGFR < 90 ml min <sup>-1</sup>  | 1,390 mg               | 24                  |
|                                      | eGFR < 80 ml min <sup>-1</sup>  | 1,235 mg               | 24                  |
|                                      | eGFR < 70 ml min <sup>-1</sup>  | 1,080 mg               | 24                  |
|                                      | eGFR < 60 ml min <sup>-1</sup>  | 925 mg                 | 24                  |
|                                      | eGFR < 50 ml min <sup>-1</sup>  | 770 mg                 | 24                  |
|                                      | eGFR < 40 ml min <sup>-1</sup>  | 620 mg                 | 24                  |
|                                      | eGFR < 30 ml min <sup>-1</sup>  | 465 mg                 | 24                  |
|                                      | eGFR < 20 ml min <sup>-1</sup>  | 310 mg                 | 24                  |
|                                      | eGFR < 10 ml min <sup>-1</sup>  | 155 mg                 | 24                  |

eGFR: estimated glomerular filtration rate according to:  $eGFR (mL \min^{-1}) = \frac{Weight (kg) \cdot (140 - age (yr))}{72 \cdot serum \ creatinine (mg \ dL^{-1})} \cdot 0.85$  (if female) or

$$eGFR (mL \min^{-1}) = \frac{Weight (kg) \cdot (140 - age (yr))}{serum \ creatinine (\mu mol \ L^{-1})} \cdot 1.04 \text{ (if female)} \cdot 1.23 \text{ (if male)}$$

### Supplemental Table S3

The proportion of patients achieving an AUC<sub>24h</sub> below 400 mg L<sup>-1</sup> h ( $f_{AUC<400}$ ), between 400 and 700 mg L<sup>-1</sup> h ( $f_{Target}$ ) and above 700 mg L<sup>-1</sup> h ( $f_{AUC>700}$ ) according to the original and optimized doses from the EMA-approved SmPC

| Population                                | SmPC Vancomycin 500 mg powder for concentrate solution for infusion (EMA) |              |               |                                 |              |               |
|-------------------------------------------|---------------------------------------------------------------------------|--------------|---------------|---------------------------------|--------------|---------------|
|                                           | <i>Original dosing regimen</i>                                            |              |               | <i>Optimized dosing regimen</i> |              |               |
|                                           | $f_{AUC<400}$                                                             | $f_{Target}$ | $f_{AUC>700}$ | $f_{AUC<400}$                   | $f_{Target}$ | $f_{AUC>700}$ |
| <b>Newborns (n=559)</b>                   | 0.43                                                                      | 0.46         | 0.11          | 0.17                            | 0.58         | 0.25          |
| <b>Children &amp; adolescents (n=124)</b> | 0.65                                                                      | 0.29         | 0.06          | 0.30                            | 0.51         | 0.19          |
| <b>Adults (n=732)</b>                     | 0.11                                                                      | 0.45         | 0.44          | 0.28                            | 0.49         | 0.23          |
| <b>Elderly (n=500)</b>                    | 0.06                                                                      | 0.18         | 0.76          | 0.13                            | 0.41         | 0.46          |
| <b>Very elderly (n=200)</b>               | 0.09                                                                      | 0.21         | 0.70          | 0.20                            | 0.27         | 0.53          |
| <b>Underweight adults (157)</b>           | 0.25                                                                      | 0.50         | 0.25          | 0.46                            | 0.41         | 0.13          |
| <b>Obese adults (n=272)</b>               | 0.00                                                                      | 0.19         | 0.81          | 0.05                            | 0.37         | 0.58          |
| <b>Total population (n=2544)</b>          | 0.19                                                                      | 0.35         | 0.46          | 0.21                            | 0.46         | 0.33          |

## Supplemental Table S4

The proportion of patients achieving an  $AUC_{24h}$  below  $400 \text{ mg L}^{-1} \text{ h}$  ( $f_{AUC<400}$ ), between  $400$  and  $700 \text{ mg L}^{-1} \text{ h}$  ( $f_{Target}$ ) and above  $700 \text{ mg L}^{-1} \text{ h}$  ( $f_{AUC>700}$ ) according to the original and optimized doses from the FDA-approved label.

| Population                                | Label Vancocin® HCL (FDA) |              |               |                          |              |               |
|-------------------------------------------|---------------------------|--------------|---------------|--------------------------|--------------|---------------|
|                                           | Original dosing regimen   |              |               | Optimized dosing regimen |              |               |
|                                           | $f_{AUC<400}$             | $f_{Target}$ | $f_{AUC>700}$ | $f_{AUC<400}$            | $f_{Target}$ | $f_{AUC>700}$ |
| <b>Newborns (n=559)</b>                   | 0.32                      | 0.54         | 0.14          | 0.17                     | 0.59         | 0.24          |
| <b>Children &amp; adolescents (n=124)</b> | 0.70                      | 0.25         | 0.05          | 0.24                     | 0.57         | 0.19          |
| <b>Adults (n=732)</b>                     | 0.69                      | 0.28         | 0.03          | 0.29                     | 0.59         | 0.15          |
| <b>Elderly (n=500)</b>                    | 0.58                      | 0.37         | 0.05          | 0.15                     | 0.64         | 0.21          |
| <b>Very elderly (n=200)</b>               | 0.52                      | 0.40         | 0.08          | 0.13                     | 0.64         | 0.23          |
| <b>Underweight adults (157)</b>           | 0.62                      | 0.34         | 0.04          | 0.23                     | 0.58         | 0.19          |
| <b>Obese adults (n=272)</b>               | 0.56                      | 0.37         | 0.07          | 0.16                     | 0.59         | 0.25          |
| <b>Total population (n=2544)</b>          | 0.56                      | 0.37         | 0.07          | 0.20                     | 0.60         | 0.20          |
